**Changes in free amino acid concentrations and associated gene expression profiles  
in the abdominal muscle of kuruma shrimp *Marsupenaeus japonicus* reared at  
different salinity**

Hiroki Koyama<sup>1</sup>, Nanami Mizusawa<sup>2</sup>, Masataka Hoashi<sup>2</sup>, Engkong Tan<sup>3</sup>, Ko Yasumoto<sup>2</sup>,  
Mitsuru Jimbo<sup>2</sup>, Daisuke Ikeda<sup>2</sup>, Takehiko Yokoyama<sup>2</sup>, Shuichi Asakawa<sup>3</sup>, Sanit  
Piyapattanakorn<sup>4</sup> and Shugo Watabe<sup>2,\*</sup>

<sup>1</sup>Graduate School of Biosphere Science, Hiroshima University, Hiroshima 739-8528,  
Japan

<sup>2</sup>Kitasato University School of Marine Biosciences, Kanagawa 252-0373, Japan

<sup>3</sup>Graduate School of Agricultural and Life Sciences, The University of Tokyo, Tokyo  
113-8657, Japan

<sup>4</sup>Department of Marine Science, Faculty of Science, Chulalongkorn University, Bangkok  
10330, Thailand

\*Author for correspondence: swatabe@kitasato-u.ac.jp

**Keywords:** Free amino acids, Kuruma shrimp, *Marsupenaeus japonicus*, RNA-seq,  
Salinity

**Abbreviated title:** Kuruma shrimp in different salinity

25 **Summary statement**

26 Kuruma shrimp *Marsupenaeus japonicus* changes free amino acid contents and  
27 associated gene expression levels in their muscle to adjust effectively to different salinity.

28

29

30

31

32

33

34

35

36

37

38

39

40

41

42

43

44

45

46

47

48 **Abstract**

49 Shrimps inhabiting around the coastal area can survive in a wide range of salinity.  
50 However, the molecular mechanisms involved in their adaptation to different  
51 environmental salinity have remained largely unknown. In the present study, we reared  
52 kuruma shrimp *Marsupenaeus japonicus* at 1.7 ‰, 3.4 ‰ and 4.0 ‰ salinity. After rearing  
53 for 6, 12, 24 and 72 h, we determined free amino acid concentrations in their abdominal  
54 muscle, and performed RNA-seq analysis on this muscle. The concentrations of free  
55 amino acids were clearly altered depending on salinity after rearing for 24 h. Glutamine  
56 and alanine concentrations were markedly increased following the increase of salinity. In  
57 association with such changes, many genes related to amino acid metabolism changed  
58 their expression levels. Notably, the increased glutamine content at high salinity appeared  
59 to be relevant to the increase of the expression level of the gene encoding  
60 glutamate-ammonia ligase which functions in the glutamine metabolism. Furthermore,  
61 the alanine content increased at high salinity was likely to be associated with the decrease  
62 in the expression levels of the alanine-glyoxylate transaminase gene. Thus, the changes in  
63 the concentration of free amino acids for osmoregulation in kuruma shrimp are  
64 considered to be regulated by the changes in the expression levels of genes related to  
65 amino acid metabolism.

66

67

68

69

70

71

72 **Introduction**

73        Shrimps belong to the class Crustacea, which form a large diverse group in  
 74        invertebrates and some of them have exploited their niche by adaptation to different  
 75        temperature as an isolation factor (David, 2014; Jorde *et al.*, 2015; Martin and Davis,  
 76        2001). Several shrimps inhabiting the coastal area can survive in a wide range of salinity,  
 77        by changing intracellular free amino acid concentrations to maintain osmotic pressures  
 78        (Camien *et al.*, 1951; Freire *et al.*, 2008; Henry *et al.*, 1980; McNamara *et al.*, 2004). It  
 79        has been reported that the concentrations of total free amino acids were increased in the  
 80        muscles of crayfish *Procambarus clarkii* and kuruma shrimp *Marsupenaeus japonicus*  
 81        following the increase of environmental salinity, and the changes were largely due to  
 82        those of glycine and L-alanine (Abe *et al.*, 2005; Okuma and Abe, 1994). Therefore, the  
 83        two amino acids are considered to be important osmolytes for these invertebrates (Abe *et*  
 84        *al.*, 1999, 2005; Fujimori and Abe, 2002; Okuma and Abe, 1994). Another experiments  
 85        indicated that the concentrations of total free amino acids were decreased in the muscle of  
 86        Pacific white shrimp *Litopenaeus vannamei* reared at low salinity, whereas those of  
 87        glycine and L-serine were increased in the hemolymph to decrease the osmotic pressure  
 88        in the muscle, suggesting that tissue amino acids were released into the hemolymph to  
 89        lower the osmolarity of the tissue (Shinji *et al.*, 2012).

90        Despite such fact, the adaptation to different salinity will be alternatively regulated by  
 91        the particular genes. Suppression subtractive hybridization and real-time PCR revealed  
 92        the relationship between environmental salinity and gene expression levels. For instance,  
 93        black tiger shrimp *Penaeus monodon* (Shekhar *et al.*, 2013, 2014), Pacific white shrimp  
 94        (Gao *et al.*, 2012; Sun *et al.*, 2011) and ridgetail white prawn *Exopalaemon carinicauda*  
 95        (Li *et al.*, 2015) increased the expression levels of the gene encoding Na<sup>+</sup>/K<sup>+</sup>-ATPase  
 96        α-subunit in various tissues such as gills, gut, hepatopancreas and antennal glands

97 exposed to either high or low salinity.  $\text{Na}^+/\text{K}^+$ -ATPase is known as one of the ion  
98 transporters which exchange ions between cytoplasm and hemolymph to maintain  
99 inorganic ion concentrations in shrimp (Boudour-Bouchecker *et al.*, 2014; Faleiros *et al.*,  
100 2010; Havird *et al.*, 2014; Holliday, 1985), suggesting that  $\text{Na}^+/\text{K}^+$ -ATPase plays an  
101 important role in osmoregulatory systems at both high and low salinity. Black tiger  
102 shrimp exposed to high salinity also increased the expression levels of genes encoding  
103 intracellular fatty acid binding proteins in gut tissues (Shekhar *et al.*, 2013), whereas  
104 Pacific white shrimp decreased those encoding hemocyanin, chitinase,  
105 ecdysteroid-regulated protein, trypsin and chymotrypsin 1 in hepatopancreas (Gao *et al.*,  
106 2012; Sun *et al.*, 2011).

107 RNA-seq analysis has been demonstrated to be a powerful method to examine the  
108 effects of salinity or temperature on gene expression levels in several invertebrates  
109 (Huang *et al.*, 2017; Lv *et al.*, 2013; Meng *et al.*, 2013; Santos *et al.*, 2014; Sellars *et al.*,  
110 2015; Zhao *et al.*, 2012). It has been reported that swimming crab *Portunus*  
111 *trituberculatus* reared for ten days at different salinity changed the expression levels of  
112 osmoregulation-related genes such as those encoding ion transporters and amino acid  
113 metabolism-related proteins in their gills (Lv *et al.*, 2013).

114 As mentioned above, many genes including ion and amino acid transporters seem to  
115 participate in adaptation of crustaceans to the salinity change. However, the molecular  
116 mechanisms involved have still remained unclear, since the regulatory mechanisms  
117 underlying the changes of free amino acid concentrations are not well understood.

118 In the present study, we targeted kuruma shrimp as experimental animals, which are  
119 widely cultured and commercially available, important species. We reared the shrimp  
120 samples at different salinity and determined free amino acid concentrations in their

121 abdominal muscle. In addition, we performed RNA-seq analysis on the same samples by  
122 using a next generation sequencer.

123

## 124 **Materials and methods**

### 125 **Animals**

126 About 40 adult specimens of kuruma shrimp were obtained from Miyazaki Prefecture,  
127 Japan, and cultured in 3.4 ‰ salinity tank (60 l) of Kitasato University at 25 °C for 3 days.  
128 Then, they were divided into 3 groups using 60 l tanks each at 1.7 ‰, 3.4 ‰ and 4.0 ‰  
129 salinity. Shrimp were fed commercially available pellets for shrimp ad libitum under  
130 about 14 h : 10 h light : dark cycle. After rearing at 25 °C for 6, 12, 24 and 72 h, three  
131 specimens were collected each from the three tanks. The body lengths and weights of  
132 kuruma shrimp samples are shown in Table 1.

133

### 134 **The determination of free amino acid concentrations**

135 The second abdominal segments (Fig. 1) of three kuruma shrimp each from different  
136 salinity tanks were dissected after rearing for different periods, homogenized individually  
137 with 8 volumes of 10 ‰ perchloric acid (w/w), and centrifuged at 12,000 g for 20 min at 4  
138 °C. The resulting supernatant was neutralized with an appropriate amount of 12 mol l<sup>-1</sup>  
139 and 2 mol l<sup>-1</sup> KOH, and centrifuged at 12,000 g for 20 min at 4 °C to collect the  
140 supernatant containing free amino acids. Free amino acids were derivatized with  
141 *O*-phthalaldehyde and 3-mercaptopropionic acid, and their concentrations were  
142 determined by using a high performance liquid chromatography LC-2000 series (Jasco,  
143 Tokyo, Japan) with a reverse-phase column TSK gel ODS-80Ts (length, 250 mm; inside  
144 diameter, 4.6 mm) (Tosoh, Tokyo, Japan). Mobile phase A consisted of 50 mmol l<sup>-1</sup>

145 sodium acetate buffer (pH 5.63) and mobile phase B, 20 % 50 mmol l<sup>-1</sup> sodium acetate  
 146 buffer (pH 5.63) plus 80 % absolute methanol (v/v). Amino acids were eluted at room  
 147 temperature with a linear gradient from A : B = 100 : 0 to A : B =10 : 90 in 75 min at a  
 148 flow rate of 1.0 ml min<sup>-1</sup>. Excitation and emission wavelengths to detect derivatized  
 149 amino acids were 340 nm and 450 nm, respectively. The present method cannot  
 150 distinguish between L- and D-amino acids.

151

## 152 Water content

153 The fourth and fifth abdominal segments (Fig. 1) of three specimens each from  
 154 different salinity tanks were collected after rearing for various periods and minced  
 155 individually. The water content was measured with an MA35 moisture meter (Sartorius,  
 156 Göttingen, Germany) according to the manufacturer's instructions.

157

## 158 The construction of cDNA library

159 Total RNAs were extracted from the third abdominal segments (Fig. 1) each of three  
 160 specimens reared at different salinity for 24 h, using ISOGEN II solution (Nippon Gene,  
 161 Tokyo, Japan) according to the manufacturer's instructions, where 30 µg of total RNAs  
 162 each from three specimens reared at 1.7 %, 3.4 % or 4.0 % salinity tanks were mixed,  
 163 respectively. These total RNAs were treated with DNase I (Takara, Otsu, Japan) to digest  
 164 contaminated gDNA. Then, mRNAs were purified by using Poly(A)<sup>+</sup> Isolation Kit from  
 165 Total RNA (Nippon Gene). Subsequently, cDNA libraries were constructed from purified  
 166 mRNAs by using Ion Total RNA-Seq Kit v2 (Life Technologies, Carlsbad, CA, USA)  
 167 according to the manufacturer's instructions. The average size of each cDNA library was  
 168 determined with a 2100 Bioanalyzer (Agilent Technologies, Santa Clara, CA, USA).

169

## 170 Sequencing

171 cDNA libraries prepared as above were treated with an Ion PGM Sequencing 200 Kit  
172 (Life Technologies) and supplied to an Ion 318 Chip (Life Technologies) according to the  
173 manufacturer's instructions. Sequencing was performed by using an Ion PGM next  
174 generation sequencer (Life Technologies). Sequencing data was subjected to the Maser  
175 analysis platform provided by National Institute of Genetics in Japan.

176

## 177 Statistical analysis

178 Data were analyzed with one-way or two-way analysis of variance (ANOVA) and  
179 differences shown in ANOVA were analyzed with the Tukey's method. The statistical  
180 analysis was also carried out by Student's *t*- tests.

181

## 182 Results

### 183 Free amino acid content

184 The content of total free amino acids extracted from the abdominal muscle in the  
185 starting samples of kuruma shrimp (0 h) after rearing at 3.4 % salinity for three days was  
186  $260.7 \pm 30.6 \mu\text{mol g}^{-1}$  tissue (Fig. 2). The most abundant free amino acid was glycine,  
187 followed by arginine, glutamine and alanine in most cases. ANOVA analysis revealed that  
188 the content of total free amino acids at 3.4 % salinity did not change significantly during  
189 rearing for another three days (72 h) ( $P > 0.05$ ). The average content in the samples reared  
190 for 24 h at 1.7% salinity was significantly lower than that at 4.0 % salinity as well as that  
191 at 3.4 % salinity (Student's *t*-test,  $P < 0.05$ ). After 72 h, the content of total free amino  
192 acids at 4.0 % salinity was significantly higher than those at 1.7 % salinity ( $P < 0.01$ ) and



193 at 3.4 % salinity ( $P < 0.05$ ). The content at 3.4 % salinity was also significantly higher  
194 than that at 1.7 % salinity ( $P < 0.05$ ). The content of total free amino acids was also higher  
195 at 3.4 % than at 1.7 % salinity after rearing for 6 h ( $P < 0.05$ ).

196 The changes in the major free amino acids during rearing were compared individually.  
197 No statistical differences were observed for glycine at any salinity (Fig. 3), although the  
198 content of glycine was the highest among all free amino acids (Fig. 2). The content of  
199 arginine having the second largest content showed significant difference only between the  
200 samples at 1.7 % and 4.0 % salinity after 72 h (Fig. 4).

201 Marked changes were observed in the content of glutamine as shown in Figure 5. The  
202 statistical analysis did not show any significant differences for the samples at 3.4 %  
203 salinity for any rearing periods, although the content for 0 h was apparently higher than  
204 those for 6 – 72 h. Student's *t*-test revealed that the content at 4.0 % salinity was  
205 significantly higher than that at 1.7 % salinity after rearing for 24 and 72 h ( $P < 0.01$ ). The  
206 content at 3.4 % salinity was also significantly higher than that at 1.7 % salinity after 72 h.  
207 ANOVA analysis demonstrated that the content at 1.7 % salinity after 6 h was  
208 significantly higher than that after 12 h, whereas the content at 4.0 % salinity after 12 h  
209 was significantly lower than those after 6, 24 and 72 h at the same salinity.

210 The content of alanine showed the changes similar to those of glutamine as shown in  
211 Figure 6. The highly significant differences ( $P < 0.01$ ) were observed in the content  
212 between the samples at 1.7 % and 4.0 % salinity after 24 and 72 h as well as between  
213 those at 3.4 % and 4.0 % salinity after 72 h. The difference between the samples at 1.7 %  
214 and 3.4 % salinity was also significant ( $P < 0.05$ ). ANOVA analysis demonstrated that the  
215 contents after 24 and 72 h were significantly higher than those after 6 and 12 h for the  
216 samples at 4.0 % salinity. Taken together, it was found that the contents of glutamine and

alanine changed clearly after rearing kuruma shrimp at 1.7 % and 4.0 % salinity.

Water content

Figure 7 shows the changes in the water content of kuruma shrimp reared at different salinity. The water content was 74.9 % initially. ANOVA analysis demonstrated that the water content was not significantly changed when the samples were reared during 72 h at 3.4 % and 4.0 % salinity. On the other hand, the water content for samples reared for 24 h at 1.7 % salinity was significantly higher than those after 6 and 72 h. The differences in the water content for the samples after rearing for the same period at different salinity were significant between those at 1.7 % and 4.0 % salinity after 6 h ( $P < 0.01$ ), 12 h ( $P < 0.05$ ), 24 h ( $P < 0.01$ ) and 72 h ( $P < 0.01$ ). The significant differences were also observed between the samples at 1.7 % and 3.4 % salinity after 12 h, 24 h and 72 h ( $P < 0.05$ ). However, no significant difference was observed between the samples at 3.4 % and 4.0 % when the contents after the same period were compared.

Figure S1 shows the relationship between the water content and total free amino acid contents. The contents of total free amino acids were inversely proportional to the water content with a significant relative coefficient value of  $r = -0.54076$ .

RNA-seq analysis

To minimize any possible individual variations, we mixed mRNAs prepared each from three specimens with the same amount (30  $\mu\text{g}$ ) for all sampling points as described in Materials and methods. Table S1 shows the average sizes of the constructed cDNA libraries for the samples reared for 24 h at 1.7, 3.4 and 4.0 % salinity, together with corresponding Ion PGM sequencing data. RNA-sequencing (RNA-seq) data for the

241 samples reared at 1.7 % and 4.0 % salinity were subjected to the MA plot analysis (Wang  
242 *et al.*, 2010), together with those for the samples reared at 3.4 % salinity as a reference.  
243 The genes whose expression levels at 1.7 % salinity were increased and decreased more  
244 than 2 folds than those at 3.4 % salinity were 8,696 and 5,367, respectively (Table S2, Fig.  
245 S2). On the other hand, the corresponding numbers at 4.0 % salinity compared with those  
246 at 3.4 % salinity were 3,407 and 3,683, respectively (Table S2, Fig. S3).

247 Tables S3 - S6 show the genes whose expression levels were increased or decreased  
248 more than 10 folds during rearing for 24 h at 1.7 % or 4.0 % salinity compared with those  
249 at 3.4 % salinity as a reference, together with gene names, fragments per kilobase of  
250 transcript per million fragments (FPKM) values and fold change (FC). The genes whose  
251 expression levels were increased at 1.7 % salinity were 2,065, among which 124 genes  
252 were identified (Table S3). On the other hand, the genes whose expression levels were  
253 decreased at 1.7 % salinity were 2,618, among which 113 genes were identified (Table  
254 S4). Meanwhile, the numbers of the genes whose expression levels were increased and  
255 decreased at 4.0 % salinity were 444 and 302, respectively, among which 16 and 31 genes  
256 were identified, respectively (Tables S5 and S6).

257

## 258 Gene expression profiles in glutamine- and alanine-related metabolic pathways

259 Glutamine-related metabolic pathways are shown in Fig. 8, where the changes in the  
260 expression levels of the genes encoding glutamate synthase, glutamate-ammonia ligase,  
261 glutaminase, glutamine-fructose-6-phosphate transaminase and  
262 amidophosphoribosyltransferase determined by RNA-seq analysis for the samples reared  
263 for 24 h at different salinity are depicted, together with the changes in the content of  
264 glutamine and glutamate after the same rearing period (Figs. 2 and 5). The expression

265 levels of these genes except that encoding glutamate-ammonia ligase were decreased in  
266 association with the increase of salinity. On the other hand, the expression levels of the  
267 glutamate-ammonia ligase gene were increased following the increase of salinity.

268 Alanine-related metabolic pathways are shown in Fig. 9, where the changes in the  
269 expression levels of the genes encoding alanine transaminase and alanine-glyoxylate  
270 transaminase determined by RNA-seq analysis for the samples after 24 h at different  
271 salinity as those for glutamine are depicted, together with the changes in the content of  
272 alanine after the rearing period of 24 h at different salinity (Figs 2 and 6). The expression  
273 levels of the alanine dehydrogenase gene were decreased following the increase of  
274 salinity, whereas those of the alanine-glyoxylate transaminase gene were higher for the  
275 samples at 3.4 % salinity than those at 1.7 % and 4.0 % salinity. Unfortunately, the gene  
276 encoding alanine dehydrogenase could not be detected in the present RNA-seq analysis.

277

278 Expression profiles of genes other than those related to amino acid metabolism

279 RNA-seq analysis revealed that many genes other than those related to amino acid  
280 metabolism altered their expression levels, when the samples were reared for 24 h at  
281 different salinity (Tables S3 – S6, Figs. S2 and S3). The expression levels of the genes  
282 encoding myosin heavy chain (MYH) type 1 (MYH1) and MYH2 were increased at  
283 1.7 % salinity (Table S3). The expression levels of MYH3 were decreased at 1.7 %  
284 salinity (Table S4) and increased at 4.0 % salinity (Table S5).

285 The expression levels of the genes encoding sarco/endoplasmic reticulum  $\text{Ca}^{2+}$ -ATPase  
286 (SERCA) and ATP synthase subunit 9 mitochondrial precursor were decreased at 1.7 %  
287 salinity. On the other hand, the expression levels of the gene encoding  $\text{Na}^+/\text{K}^+$ -ATPase  
288  $\alpha$ -subunit were increased at 1.7 % salinity (Table S3).

289

## 290 **Discussion**

291 In order to understand the mechanisms involved in the adaptation of kuruma shrimp to  
292 different environmental salinity, we determined the contents of free amino acids in the  
293 abdominal muscle from the samples reared at different salinity for various time periods  
294 until 72 h. As shown in Fig. 2, the contents of total free amino acids were changed  
295 following the alternation of rearing salinity. It has been reported that the concentrations of  
296 total free amino acids in kuruma shrimp were increased following the increase of salinity  
297 during 4 days (Abe *et al.*, 2005). We obtained similar results in the present study. In  
298 addition, the present study demonstrated that it took 24 h to change the contents of free  
299 amino acids following the alternation of salinity.

300 Figure 2 also shows that glycine, arginine, glutamine and alanine were the major free  
301 amino acids as reported previously (Abe *et al.*, 2005). Figures 3 - 6 show the changes in  
302 the contents of these major amino acids, respectively. The content of glycine did not  
303 change significantly (Fig 3), although previous investigations observed the increase of  
304 the glycine content in the muscles of kuruma shrimp and crayfish (Okuma and Abe, 1994;  
305 Abe *et al.*, 2005). The content of arginine neither changed significantly following the  
306 increase of salinity (Fig. 4), whereas those of glutamine and alanine were increased at  
307 high salinity and decreased at low salinity after rearing for 24 h (Figs. 5 and 6). Therefore,  
308 these two amino acids were found in the present study to possibly play as osmolytes,  
309 taking at least 24 h to adjust the cellular osmotic pressure to the environmental salinity.  
310 We reported previously the changes in the accumulation of metabolites in brackish water  
311 clam *Corbicula japonica* exposed to different salinity, where the content of L-alanine was  
312 also increased in association with the increase of environmental salinity, although that of

313 L-glutamine was not changed significantly (Koyama *et al.*, 2015; Okamoto *et al.*, 2012).

314 Therefore, it is considered that alanine is an osmolyte common to invertebrates having

315 open vascular systems.

316 The water content of the samples reared at 1.7 % salinity was increased significantly

317 during the rearing period up to 24 h and returned to the original level subsequently (Fig.

318 7). On the other hand, the water content in the samples reared at 4.0 % salinity tended to

319 be decreased gradually during rearing for 72 h, although this tendency was not

320 significantly by ANOVA.

321 The increase of water content was almost proportional to the decrease in the content of

322 total free amino acids ( $r = -0.54076$ , Fig. S1). Although the contents of free amino acids

323 were increased following the decrease of the water content, the difference in the water

324 content between the samples reared for 72 h at 1.7 % and 4.0 % salinity (5 %) was much

325 less than that in the content of total free amino acids between the same samples (30 %).

326 Thus, the increase in the content of total free amino acids following the increase of

327 salinity is not likely the simple effect of the decrease in the water content, but seems

328 attributable to the adaptation of kuruma shrimp to high salinity by increasing the

329 concentration of free amino acids as reported previously (Okuma and Abe, 1994; Abe *et*

330 *al.*, 2005).

331 Figure 8 shows the metabolic pathways of glutamine and its related compounds. The

332 content of glutamine was increased following the increase of salinity after rearing for 24 h

333 (Fig. 5). The FPKM value of the gene encoding glutamate-ammonia ligase was also

334 increased following the increase of salinity, and those of other four genes found in the

335 present study were rather decreased at high salinity (Fig. 8). Therefore, it is considered

336 that glutamine was synthesized from glutamate by glutamate-ammonia ligase in response

337 to high salinity, thus increasing the concentration of glutamine at this salinity. Other four  
338 enzymes including glutamate synthase, glutaminase, glutamine-fructose-6-phosphate  
339 transaminase and amidophosphoribosyltransferase all enhanced their expression at 1.7 %  
340 salinity. These results suggest that glutamine were catabolized to glutamate,  
341 D-glucosamine 6-phosphate or 5-phosphoribosylamine, thus decreasing the  
342 concentration of glutamine at this low salinity.

343 Figure 9 shows the metabolic pathways of alanine and its related compounds. As in the  
344 case of glutamine, the content of alanine was increased following the increase of  
345 environmental salinity after 24 h (Fig. 6). The FPKM value of the alanine-glyoxylate  
346 transaminase gene was increased at low salinity, whereas that of the alanine transaminase  
347 was not changed markedly at different salinity. Thus it seems that alanine was catabolized  
348 to pyruvate by alanine-glyoxylate transaminase gene at low salinity, decreasing the  
349 concentration of alanine at this low salinity. However, we could not detect the transcripts  
350 encoded by the alanine dehydrogenase gene. Thus, the mechanisms involved in the  
351 changes of the alanine content at different salinity have remained unclear. In this regard, it  
352 has been reported that pyruvate was not detected in the gill and foot muscle of brackish  
353 water clam, although the content of alanine was increased at high salinity (Koyama *et al.*,  
354 2015). Pyruvate once accumulated at low salinity might have been quickly catabolized  
355 into another substance.

356 Although we did not carry out real-time PCR to confirm the data obtained from global  
357 gene expression analysis by RNA-seq in the present study, we previously demonstrated  
358 on similar works for fish that the RNA-seq data were satisfactorily verified by real-time  
359 PCR experiments (Ikeda *et al.*, 2017; Tan *et al.*, 2012)

360 The expression levels of the MYH1 and MYH2 genes were increased at 1.7 % salinity

(Table S3). MYH is the major muscle protein and two types of the MYH genes, *MHC1* and *MHC2*, which correspond to the genes encoding MYH1 and MYH2, respectively, have been reported to be expressed in the abdominal muscle of kuruma, black tiger and Pacific white shrimps (Koyama *et al.*, 2012a, b). These are expressed only in flexor muscle and both in flexor and extensor muscles having anaerobic metabolism, respectively. In the present study, the expression levels of MYH1 at 3.4 % salinity were about 1.5 folds more than that of MYH2, and the expression levels of MYH2 at 1.7 % salinity were about 3 folds more than that of MYH1. The expression levels of MYH3 were decreased at 1.7 % salinity (Table S4) and increased at 4.0 % salinity (Table S5). The MYH3 gene has been reported as *MHC3* to be expressed in the pleopod muscle having aerobic metabolism of kuruma shrimp and black tiger shrimp (Koyama *et al.*, 2013).

SERCA plays an important role to regulate the calcium concentration in cytoplasm (Clapham, 1995). It has been reported that the expression levels of SERCA in the muscle of Pacific white shrimp reared at high salinity were higher than those at low salinity (Wang *et al.*, 2013). Although, the expression levels of the SERCA gene were decreased at 1.7 % salinity, we did not observe the increase at 4.0 % salinity in this study (Table S4). The expression levels of the ATP synthase subunit 9 mitochondrial precursor gene were also decreased at 1.7 % salinity (Table S4). Such decreased expression levels of this gene have been reported in the gill from Pacific white shrimp reared at low salinity (Gonçalves-Soares *et al.*, 2012).

The expression levels of the  $\text{Na}^+/\text{K}^+$ -ATPase  $\alpha$ -subunit gene were increased at 1.7 % salinity (Table S3). Such enhanced expression of the  $\text{Na}^+/\text{K}^+$ -ATPase  $\alpha$ -subunit gene has been reported in the gill from black tiger shrimp reared at low salinity (Shekhar *et al.*,



2013), suggesting that ion transporters such as Na<sup>+</sup>/K<sup>+</sup>-ATPase are considered to play an important role to adjust the cellular osmotic pressure to the environmental salinity.

In conclusion, we examined the contents of free amino acids and gene expression profiles of kuruma shrimp reared at different salinity. A number of genes changed their expression levels to adapt the environmental salinity. In addition, the contents of free amino acids were considered to be regulated by various genes related to amino acid metabolism. For instance, the content of glutamine was increased at high salinity in association with the increase of the expression level of glutamate-ammonia ligase. The content of alanine was increased at high salinity in association with the decrease of the expression level of alanine-glyoxylate transaminase. In the future study, we need further investigation including the participation of D-amino acids and their related enzymes in the adaptation of shrimps to environmental salinity change.

### **Competing interests**

The authors declare no competing interests.

### **Author contributions**

H. K. and S. W. conceived the study; H. K., N. M., M. H., E. T., D. I. and T. Y. designed experiments and collected the data; H. K., N. M. and S. W. analyzed data; H. K. and S. W. wrote the paper; H. K., N. M., K. Y., M. J. and S. P. interpreted the data; H. K., N. M. and S. W. contributed substantially developing the manuscript and take full responsibility for the content of the paper.

### **Funding**

409 This work was partly supported by a Grant-in-Aid from the Japan Society of Promotion  
 410 of Science for Scientific Research (S) (SW, No. 19108003), by JSPS-NRCT Asian CORE  
 411 Program granted to Tokyo University of Marine Science and Technology and by The  
 412 Towa Foundation for Food Research.

413

#### 414 **Data availability**

415 RNA-seq data are available in the DDBJ database under the accession number of DRA  
 416 006082.

417

#### 418 **Supplementary information**

419 Supplementary information available online at <http://jeb.biologists.org/>

420

421

## 422     **References**

- 423     Abe, H., Okuma, E., Amano, H., Noda, H. and Watanabe, K. (1999). Role of free D- and  
424     L-amino acids in the muscle of crayfish during seawater acclimation. *Comp. Biochem.*  
425     *Physiol.* 109A, 191-197.
- 426     Abe, H., Yoshikawa, N., Sarower, M. G. and Okada, S. (2005). Distribution, metabolism,  
427     and physiological function of free D-amino acids in invertebrates. *Vitamin Soc. Japan*  
428     79, 79-86.
- 429     Boudour-Bouchecker, N., Boulo, V., Charmantier-Daures, M., Grousset, E., Anger, K.,  
430     Charmantier, G. and Lorin-Nebel, C. (2014). Differential distribution of V-type  
431     H<sup>+</sup>-ATPase and Na<sup>+</sup>/K<sup>+</sup>-ATPase in the branchial chamber of the palaemonid shrimp  
432     *Macrobrachium amazonicum*. *Cell Tissue Res.* 357, 195-206.
- 433     Camien, M. N., Sarlet, H., Duchâteau, G. and Florkin, M. (1951). Non-protein amino  
434     acids in muscle and blood of marine and fresh water crustacea. *J. Biol. Chem.* 193,  
435     881-885.
- 436     Clapham, D. E. (1995). Calcium signaling. *Cell* 80, 259-268.
- 437     Faleiros, R. O., Goldman, M. H. S., Furriel, R. P. M. and McNamara, J. C. (2010).  
438     Differential adjustment in gill Na<sup>+</sup>/K<sup>+</sup>- and V-ATPase activities and transporter  
439     mRNA expression during osmoregulatory acclimation in the cinnamon shrimp  
440     *Macrobrachium amazonicum* (Decapoda, Palaemonidae). *J. Exp. Biol.* 213,  
441     3894-3905.
- 442     Freire, C. A., Onken, H. and McNamara, J. C. (2008). A structure-function analysis of ion  
443     transport in crustacean gills and excretory organs. *Comp. Biochem. Physiol.* 151A,  
444     272-304.
- 445     Fujimori, T. and Abe, H. (2002). Physiological roles of free D- and L-alanine in the

446 crayfish *Procambarus clarkii* with special reference to osmotic and anoxic stress  
447 responses. *Comp. Biochem. Physiol.* 131A, 893-900.

448 Gao, W., Tan, B., Mai, K., Chi, S., Liu, H., Dong, X. and Yang, Q. (2012). Profiling of  
449 differentially expressed genes in hepatopancreas of white shrimp (*Litopenaeus*  
450 *vannamei*) exposed to long-term low salinity stress. *Aquaculture* 364-365, 186-191.

451 Gonçalves-Soares, D., Seiffert, W. Q., Schlindwein, A. D., Toledo-Silva, G., Zanette, J.,  
452 Marques, M. R. F. and Bainy, A. C. D. (2012). Identification of differentially  
453 transcribed genes in shrimp *Litopenaeus vannamei* exposed to osmotic stress and  
454 challenged with WSSV virus. *Comp. Biochem. Physiol.* 7D, 73-81.

455 Havird, J. C., Santos, S. R. and Henry, R. P. (2014). Osmoregulation in the Hawaiian  
456 anchialine shrimp *Halocaridina rubra* (Crustacea: Atyidae): expression of ion  
457 transporters, mitochondria-rich cell proliferation and hemolymph osmolality during  
458 salinity transfers. *J. Exp. Biol.* 217, 2309-2320.

459 Henry, R. P., Mangum, C. P. and Webb, K. L. (1980). Salt and water balance in the  
460 oligohaline clam, *Rangia cuneata*. II. Accumulation of intracellular free amino acids  
461 during high salinity adaptation. *J. Exp. Zool.* 211, 11-24.

462 Holliday, C. W. (1985). Salinity induced changes in gill Na, K-ATPase activity in the mud  
463 fiddler crab, *Uca pugnax*. *J. Exp. Zool.* 233, 199-208.

464 Huang, W., Ren, C., Li, H., Huo, D., Wang, Y., Jiang, X., Tian, Y., Luo, P., Chen, T. and  
465 Hu, C. (2017). Transcriptomic analysis on muscle tissues of *Litopenaeus vannamei*  
466 provide the first profile insight into the response to low temperature stress. *PloS One*  
467 12, e0178604.

468 Ikeda, D., Koyama, H., Mizusawa, N., Kan-no, N., Tan, E., Asakawa, S. and Watabe, S.  
469 (2017) Global gene expression analysis of the muscle tissues of medaka acclimated to

low and high environmental temperatures. *Comp. Biochem. Physiol.* 24D, 19-28.

Jorde, P. E., Søvik, G., Westgaard, J. I., Albretsen, J., André, C., Hvingel, C., Johansen, T., Sandvik, A. D., Kingsley, M. and Jørstad, K. E. (2015). Genetically distinct populations of northern shrimp, *Pandalus borealis*, in the Northern Atlantic: adaptation to different temperatures as an isolation factor. *Mol. Ecol.* 24, 1742-1757.

Judkins, D. C. (2014). Geographical distribution of pelagic decapod shrimp in the Atlantic Ocean. *Zootaxa* 3895, 301-345.

Koyama, H., Akolkar, D. B., Shiokai, T., Nakaya, M., Piyapattanakorn, S. and Watabe, S. (2012a). The occurrence of two types of fast skeletal myosin heavy chains from abdominal muscle of kuruma shrimp *Marsupenaeus japonicus* and their different tissue distribution. *J. Exp. Biol.* 215, 14-21.

Koyama, H., Akolkar, D. B., Piyapattanakorn, S. and Watabe, S. (2012b). Cloning, expression, and localization of two types of fast skeletal myosin heavy chain genes from black tiger and Pacific white shrimps. *J. Exp. Zool.* 317A, 608-621.

Koyama, H., Okamoto, S., Watanabe, N., Hoshino, N., Jimbo, M., Yasumoto, K. and Watabe, S. (2015). Dynamic changes in the accumulation of metabolites in brackish water clam *Corbicula japonica* associated with alternation of salinity. *Comp. Biochem. Physiol.* 181B, 59-70.

Koyama, H., Piyapattanakorn, S. and Watabe, S. (2013). Cloning of skeletal myosin heavy chain gene family from adult pleopod muscle and whole larvae of shrimps. *J. Exp. Zool.* 319A, 268-276.

Li, J., Peng, M., Liu, P., Chen, P. and Li, J. (2015). The roles of Na<sup>+</sup>/K<sup>+</sup>-ATPase  $\alpha$ -subunit gene from the ridgetail white prawn *Exopalaemon carinicauda* in response to salinity stresses. *Fish Shellfish Immunol.* 42, 264-271.

494 Lv, J., Liu, P., Wang, Y., Gao, B., Chen, P. and Li, J. (2013). Transcriptome analysis of  
495 *Portunus trituberculatus* in response to salinity stress provides insights into the  
496 molecular basis of osmoregulation. *PloS One* 8, e82155.

497 Martin, J. W. and Davis, G. E. (2001). An updated classification of the recent crustacea.  
498 *Nat. History Museum Los Angeles Country Sci. Ser.* 39, 1-124.

499 McNamara, J. C., Rosa, J. C., Greene, L. J. and Augusto, A. (2004). Free amino acid  
500 pools as effectors of osmotic adjustment in different tissues of the freshwater shrimp  
501 *Macrobrachium olfersii* (Crustacea, Decapoda) during long-term salinity  
502 acclimation. *Mar. Freshw. Behav. Physiol.* 37, 193-208.

503 Meng, J., Zhu, Q., Zhang, L., Li, C., Li, L. She, Z., Huang, B. and Zhang, G. (2013).  
504 Genome and transcriptome analyses provide insight into the euryhaline adaptation  
505 mechanism of *Crassostrea gigas*. *Plos-One* 8, e58563.

506 Okamoto, S., Yamaguchi, H., Koyama, H., Nakaya, M., Yoneda, C. and Watabe, S.  
507 (2012). Comparison of extractive components and taste of soup from brackish water  
508 clam *Corbicula japonica* in different habitat waters of the Hinuma River system.  
509 *Nippon Suisan Gakkaishi* 78, 444-453.

510 Okuma, E and Abe, H. (1994). Total D-amino and other amino acids increase in the  
511 muscle of crayfish during seawater acclimation. *Comp. Biochem. Physiol.* 109A,  
512 191-197.

513 Santos, C. A., Blanck, D. V. and de Freitas, P. D. (2014). RNA-seq as a powerful tool for  
514 penaeid shrimp genetic progress. *Front. Genet.* 5, 298.

515 Sellars, M. J., Trewin, C., McWilliam, S. M., Graves, R. S. E. and Hertzler, P. L. (2015).  
516 Transcriptome profiles of *Penaeus (Marsupenaeus) japonicus* animal and vegetal  
517 half-embryos: identification of sex determination, germ line, mesoderm, and other

developmental genes. *Mar. Biotechnol.* 17, 252-265.

Shekhar, M. S., Kiruthika, J. and Ponniah, A. G. (2013). Identification and expression analysis of differentially expressed genes from shrimp (*Penaeus monodon*) in response to low salinity stress. *Fish Shellfish Immunol.* 35, 1957-1968.

Shekhar, M. S., Kiruthika, J., Rajesh, S. and Ponniah, A. G. (2014). High salinity induced expression profiling of differentially expressed genes in shrimp (*Penaeus monodon*). *Mol. Biol. Rep.* 41, 6275-6289.

Shinji, J., Okutsu, T., Jayasankar, V., Jasmani, S. and Wilder, M. N. (2012). Metabolism of amino acids during hyposmotic adaptation in the whiteleg shrimp, *Litopenaeus vannamei*. *Amino Acids* 43, 1945-1954.

Sun, H., Zhang, L., Ren, C., Chen, C., Fan, S., Xia, J. J., Lin, H. and Hu, C. (2011). The expression of Na, K-ATPase in *Litopenaeus vannamei* under salinity stress. *Mar. Biol. Res.* 7, 623-628.

Tan, E., Wongwarangkana, C., Kinoshita, S., Suzuki, Y., Oshima, K., Hattori, M., Ineno, T., Tamaki, K., Kera, A., Muto, K., Yada, T., Kitamura, S., Asakawa, S. and Watabe, S. (2012). Global gene expression analysis of gill tissues from normal and thermally selected strains of rainbow trout. *Fish. Sci.* 78, 1041-1049.

Wang, L., Feng, Z., Wang, X., Wang, X. and Zhang, X. (2010). DEGseq: an R package for identifying differentially expressed genes from RNA-seq data. *Bioinformatics* 26, 136-138.

Wang, Y., Luo, P., Zhang, L., Hu, C., Ren, C. and Xia, J. (2013). Cloning of sarco/endoplasmic reticulum  $\text{Ca}^{2+}$ -ATPase (SERCA) gene from white shrimp, *Litopenaeus vannamei* and its expression level analysis under salinity stress. *Mol. Biol. Rep.* 40, 6213-6221.

542 Zhao, X., Yu, H., Kong, L. and Li, Q. (2012). Transcriptomic responses to salinity stress  
543 in the Pacific oyster *Crassostrea gigas*. *PloS One* 7, e46244.

544

545



546 **List of symbols and abbreviations**

|     |         |                                                            |
|-----|---------|------------------------------------------------------------|
| 547 | ANOVA   | analysis of variance                                       |
| 548 | DDBJ    | DNA Data Bank of Japan                                     |
| 549 | FPKM    | fragments per kilobase of transcript per million fragments |
| 550 | FC      | fold change                                                |
| 551 | gDNA    | genomic DNA                                                |
| 552 | MHC     | myosin heavy chain                                         |
| 553 | MYH     | myosin heavy chain                                         |
| 554 | RNA-seq | RNA-sequencing                                             |
| 555 | SERCA   | sarco/endoplasmic reticulum Ca <sup>2+</sup> -ATPase       |

556

557

558

## 559 **Figure legends**

560 Fig. 1. The figure of kuruma shrimp. I-V correspond to the number of individual  
561 abdominal segments.

562

563 Fig. 2. The concentrations of free amino acids in the second abdominal segments of  
564 kuruma shrimp reared at 1.7 %, 3.4 % and 4.0 % salinity for various rearing periods up to  
565 72 h. Significance by Student's *t*-test at \**P* < 0.05, \*\**P* < 0.01.

566

567 Fig. 3. The concentration of glycine in the second abdominal segments of kuruma  
568 shrimp reared at different salinity for various periods up to 72 h. Open, dotted and solid  
569 bars indicate the concentrations of glycine in the samples reared at 1.7 %, 3.4 % and  
570 4.0 % salinity, respectively.

571

572 Fig. 4. The concentration of arginine in the second abdominal segments of kuruma  
573 shrimp reared at different salinity for various periods up to 72 h. Open, dotted and solid  
574 bars indicate the concentrations of arginine in the samples reared at 1.7 %, 3.4 % and  
575 4.0 % salinity, respectively. Significance by Student's *t*-test at \**P* < 0.05.

576

577 Fig. 5. The concentration of glutamine in the second abdominal segments of kuruma  
578 shrimp reared at different salinity for various periods up to 72 h. Open, dotted and solid  
579 bars indicate the concentrations of glutamine in the samples reared at 1.7 %, 3.4 % and  
580 4.0 % salinity, respectively. Significance by Student's *t*-test at \**P* < 0.05, \*\**P* < 0.01.

581 Different letters indicate significant differences by ANOVA.

582

583 Fig. 6. The concentration of alanine in the second abdominal segments of kuruma  
 584 shrimp reared at different salinity for various periods up to 72 h. Open, dotted and solid  
 585 bars indicate the concentrations of alanine in the samples reared at 1.7 %, 3.4 % and 4.0 %  
 586 salinity, respectively. Significance by Student's *t*-test at  $*P < 0.05$ ,  $**P < 0.01$ ,  $***P <$   
 587 0.001. Different letters indicate significant differences by ANOVA.

588

589 Fig. 7. The water contents in the fourth and fifth abdominal segments of kuruma shrimp  
 590 reared at different salinity for various periods up to 72 h. Dotted, dashed and solid bars  
 591 indicate the water content in the samples reared at 1.7 %, 3.4 % and 4.0 % salinity,  
 592 respectively. Significance by Student's *t*-test at  $*P < 0.05$ ,  $**P < 0.01$ . Different letters  
 593 indicate significant differences by ANOVA.

594

595 Fig. 8. Genes and metabolites related to glutamine metabolism. Open, dotted and solid  
 596 bars in squared panels indicate the contents of glutamine and its related metabolites in the  
 597 samples reared for 24 h at 1.7 %, 3.4 % and 4.0 % salinity, respectively, whereas those not  
 598 squared indicate the FPKM values of glutamine-related metabolic genes at corresponding  
 599 salinity, respectively.

600

601 Fig. 9. Genes and metabolites related to alanine metabolism. Open, dotted and solid bars  
 602 in squared panel indicates the content of alanine in the samples reared for 24 h at 1.7 %, 3.4 %  
 603 and 4.0 % salinity, respectively, whereas those not squared indicate the FPKM  
 604 values of alanine-related metabolic genes at corresponding salinity, respectively.

605

606 Fig. S1. The relationship between water content and total free amino acid content. The

607 relationship significant with coefficient of correlation ( $r$ ) of -0.54076. Significance by test  
608 for non-correlation at  $**P < 0.01$ .

609

610 Fig. S2. MA plot constructed from RNA-seq data from kuruma shrimp reared for 24 h at  
611 different salinity. The plot shows the comparison of the gene expression levels of the  
612 samples at 1.7 % salinity with those at 3.4 %. The x-axis represents the average log value  
613 of the gene expression levels (A) and y-axis represents the logarithmic value of the fold  
614 changes (FC) in the gene expression levels (M). Diamonds correspond to individual  
615 genes. Black diamonds represent the genes whose expression levels at 1.7 % salinity were  
616 increased or decreased less than 2 folds than those at 3.4 %. Red and blue diamonds  
617 represent the genes whose expression levels at 1.7 % salinity were increased and  
618 decreased more than 2 folds than those at 3.4 %, respectively.

619

620 Fig. S3. MA plot constructed from RNA-seq data from kuruma shrimp reared for 24 h at  
621 different salinity. This plot shows the comparison of the gene expression levels of the  
622 samples at 4.0 % salinity with those at 3.4 %. Refer to the legend of Fig. S2 for symbols  
623 and x- and y-axes.

(Koyama *et al.*)

**Fig. 1**

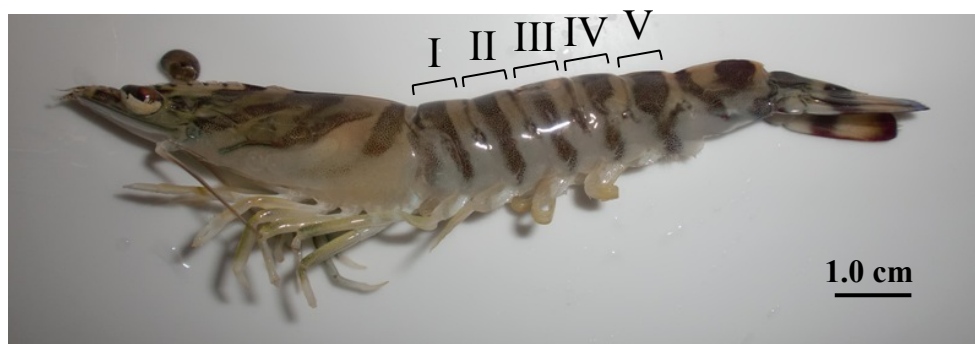

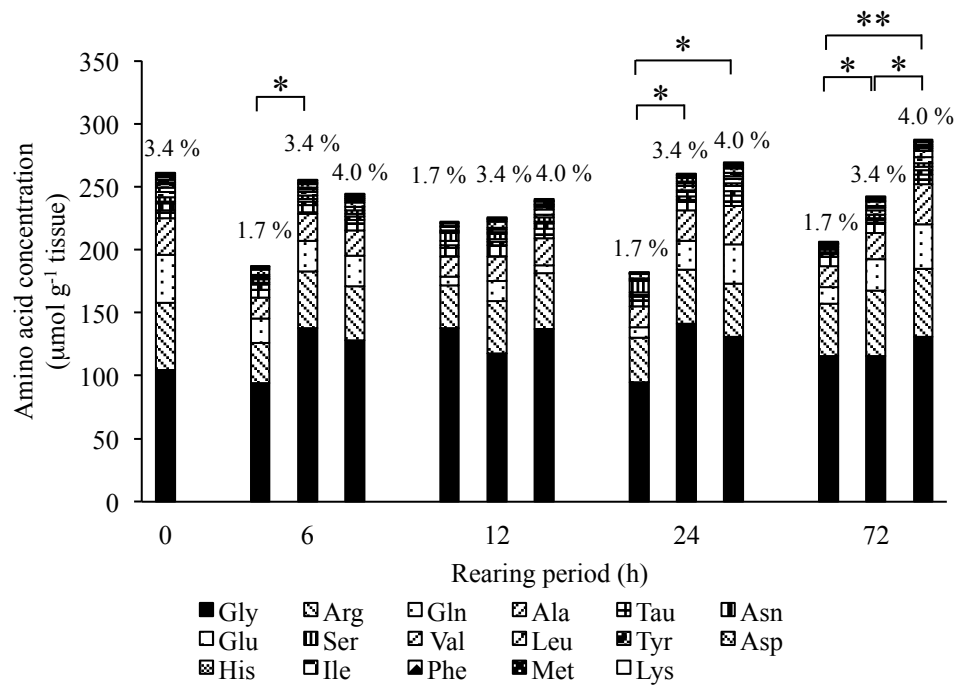

(Koyama *et al.*)  
Fig. 3

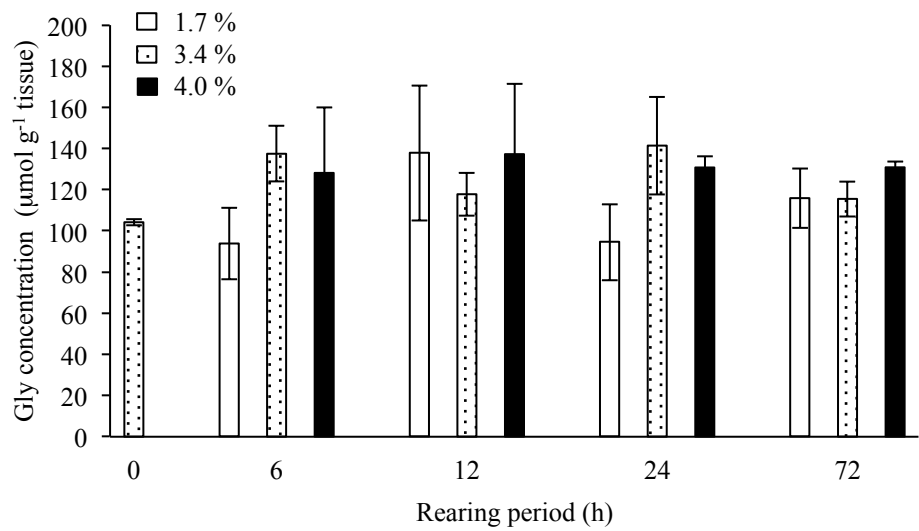

(Koyama *et al.*)  
Fig. 4

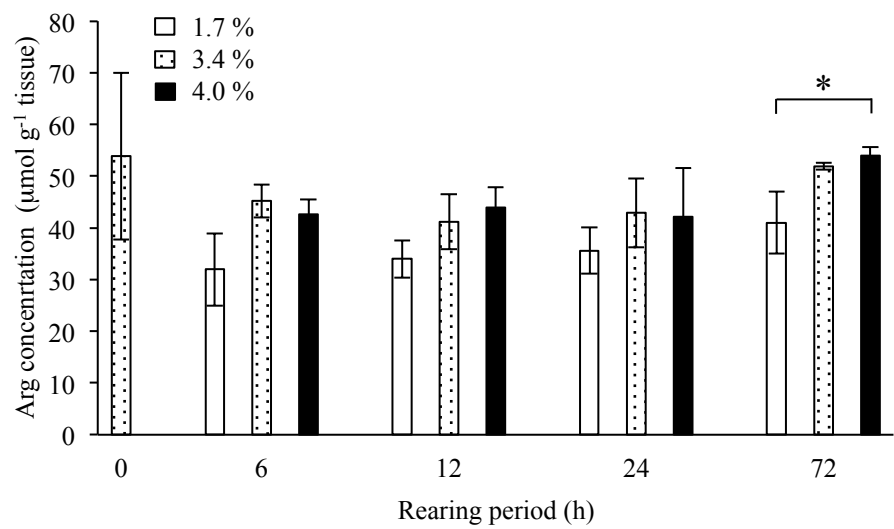



(Koyama *et al.*)  
Fig. 5

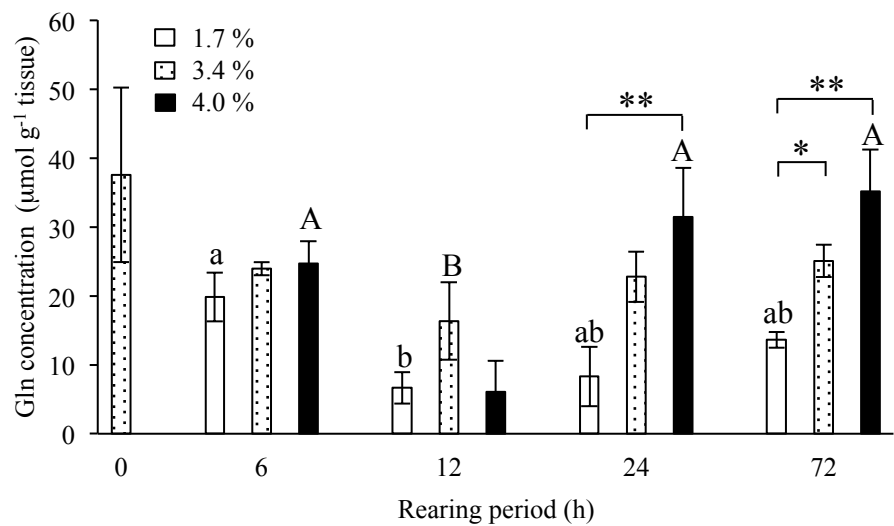

(Koyama *et al.*)  
Fig. 6

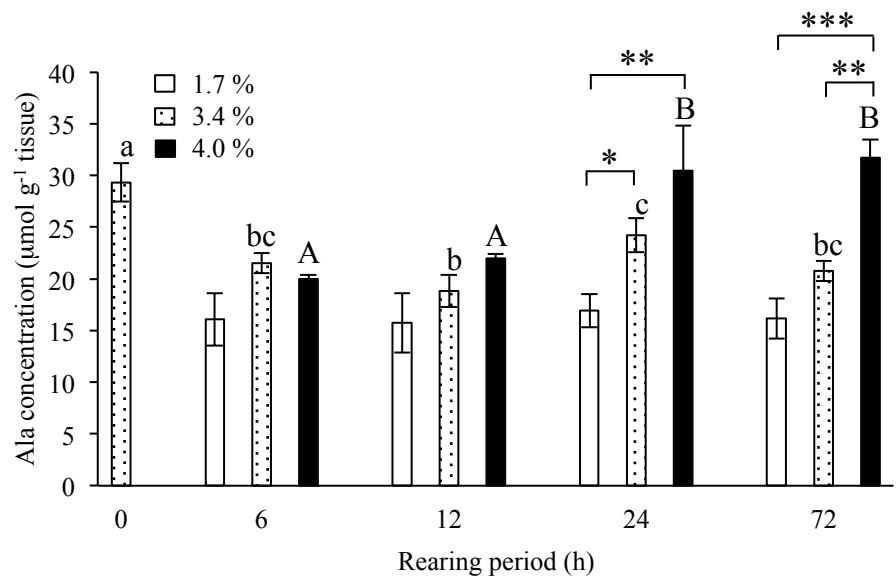

(Koyama *et al.*)  
Fig. 7

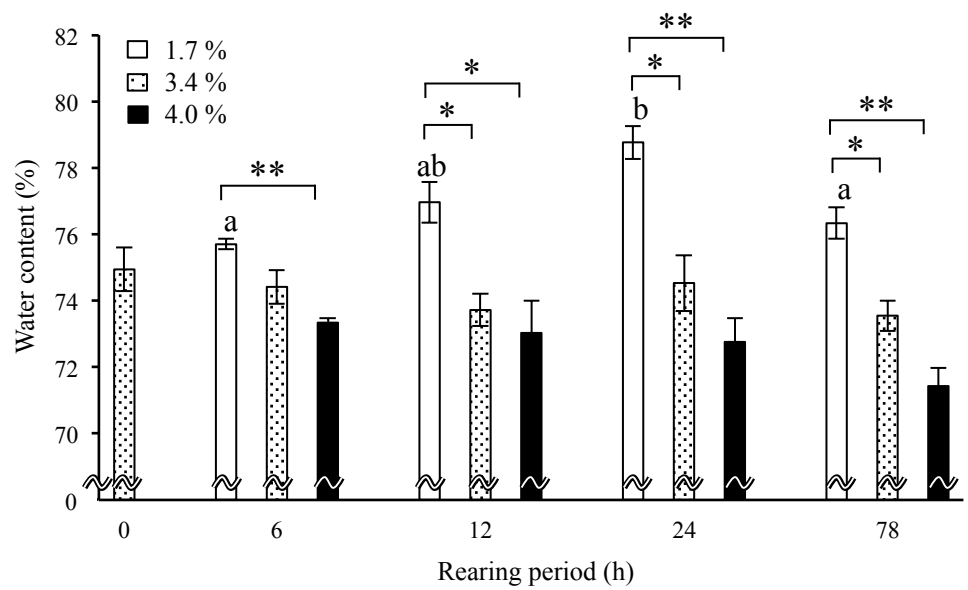

Fig. 8

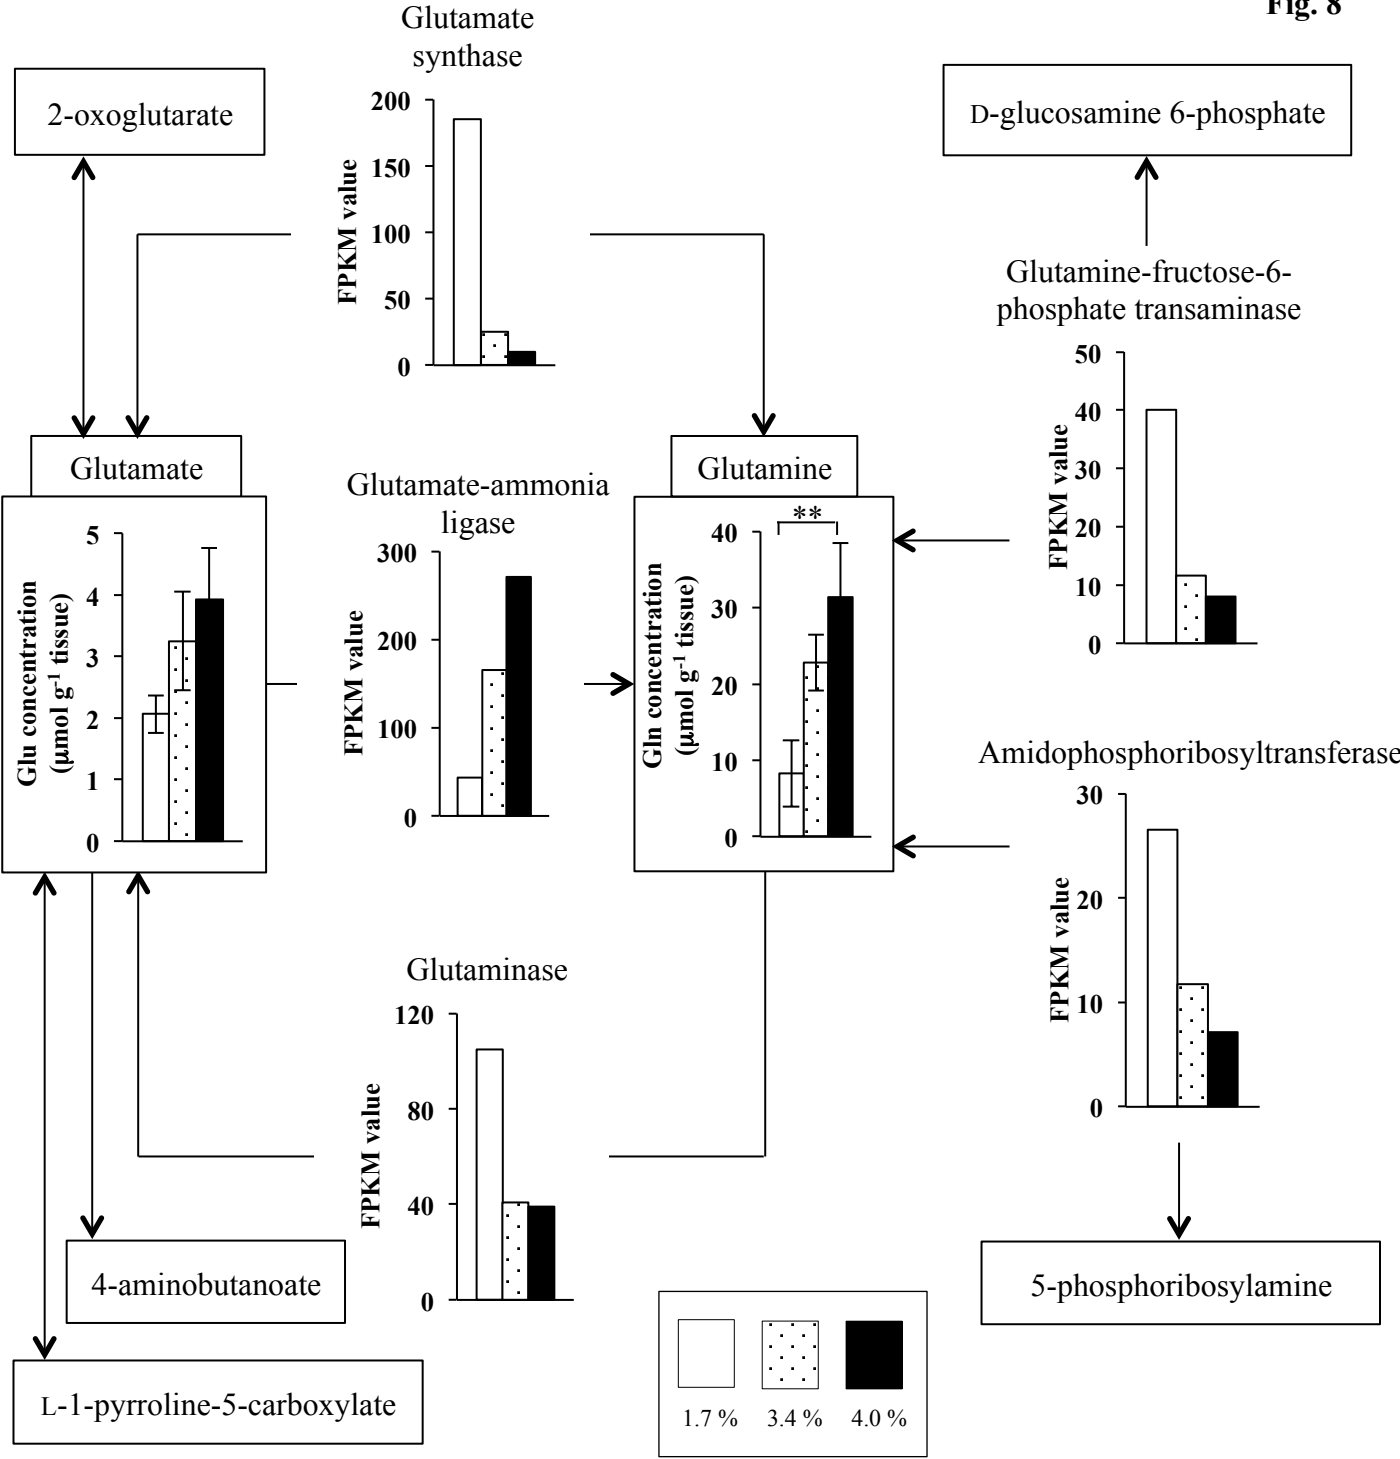

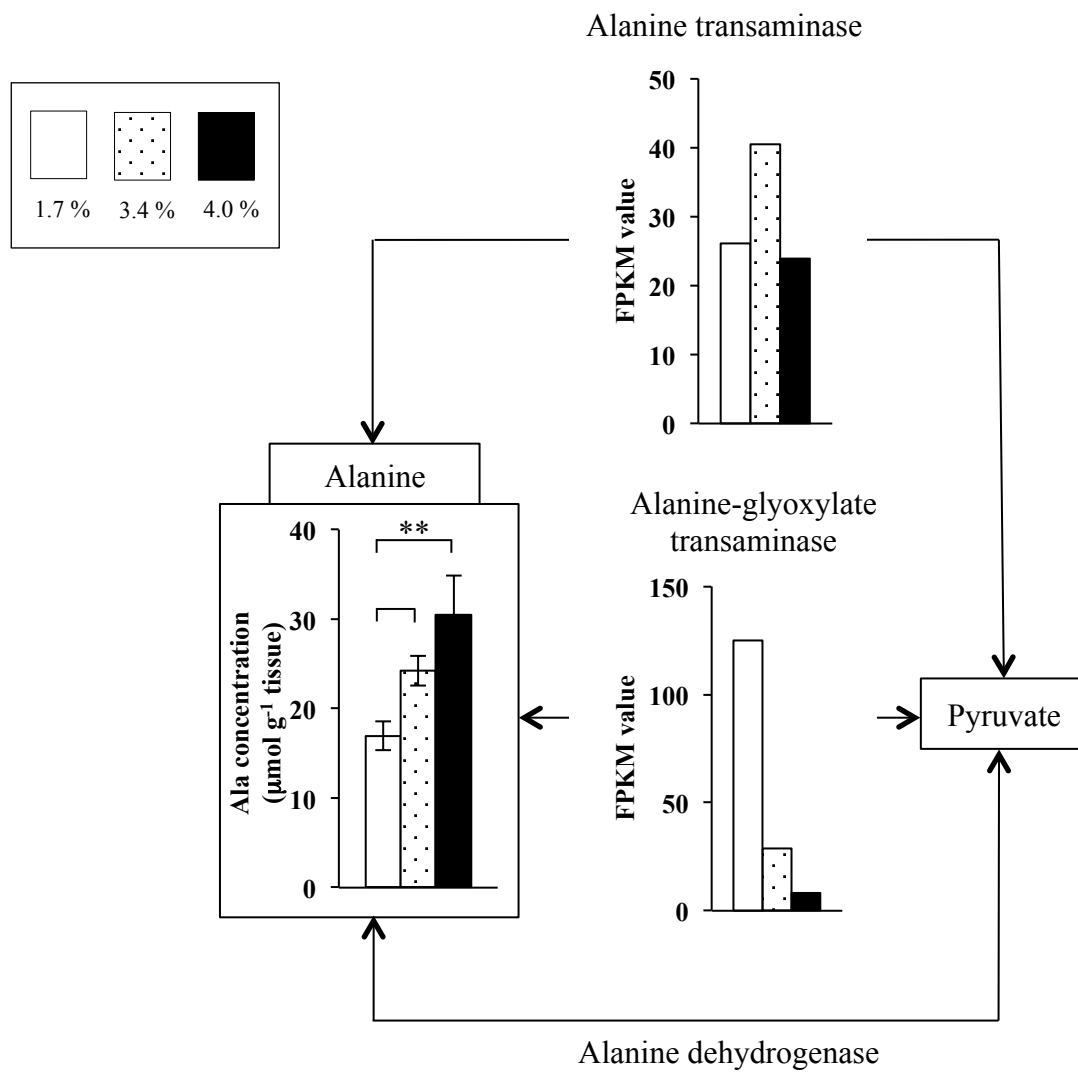

Table 1. Body length and body weight of kuruma shrimp reared at different salinity

| Salinity | 0 h              |                 | 6 h              |                 | 12 h             |                 | 24 h             |                 | 72 h             |                 |
|----------|------------------|-----------------|------------------|-----------------|------------------|-----------------|------------------|-----------------|------------------|-----------------|
|          | Body length (cm) | Body weight (g) | Body length (cm) | Body weight (g) | Body length (cm) | Body weight (g) | Body length (cm) | Body weight (g) | Body length (cm) | Body weight (g) |
| 1.7%     |                  |                 | 12.2 ± 0.21      | 15.5 ± 0.28     | 11.1 ± 0.38      | 12.1 ± 1.45     | 11.8 ± 0.16      | 10.9 ± 0.33     | 12.7 ± 0.21      | 15.3 ± 0.82     |
| 3.4%     | 10.9 ± 0.37      | 9.9 ± 0.91      | 12.4 ± 0.24      | 15.0 ± 0.56     | 11.2 ± 0.21      | 11.1 ± 0.41     | 11.4 ± 0.37      | 11.5 ± 0.34     | 12.4 ± 0.08      | 15.5 ± 0.61     |
| 4.0%     |                  |                 | 12.4 ± 0.05      | 15.3 ± 0.33     | 11.9 ± 0.05      | 11.9 ± 0.33     | 11.7 ± 0.19      | 13.6 ± 0.37     | 12.2 ± 0.24      | 15.8 ± 0.54     |

Values are given as mean ± standard deviation (n = 3).
